# Supplementary material for: Parasitological and malacological surveys to identify transmission sites for Schistosoma mansoni in Gomma District, south-western Ethiopia
Source: PubMed Central journal article supplement (PMC9556602; doi:10.1038/s41598-022-21641-2), 2022-10-12
Supplement: 41598_2022_21641_MOESM1_ESM.pdf [file 41598_2022_21641_MOESM1_ESM.pdf]

**Parasitological and malacological surveys to identify transmission sites for *Schistosoma mansoni* in Gomma District, south-western Ethiopia**

Teshome Bekana\*<sup>1,2</sup>, Endegen Abebe<sup>3</sup>, Zeleke Mekonnen<sup>4</sup>, Begna Tulu<sup>5</sup>, Keerati Ponpetch<sup>6</sup>, Song Liang<sup>7</sup>, Berhanu Erko<sup>2</sup>

**Table S1.** Sampling sites and infection status of snails in Gomma District, showing the types of water bodies, the coordinates of snail sampling points and the season sampled

| Sampling date | Month/Season       | Site (types of water bodies) | Coordinates             | Number of <i>B. pfeifferi</i> collected | Number of <i>B. pfeifferi</i> shedding cercariae |
|---------------|--------------------|------------------------------|-------------------------|-----------------------------------------|--------------------------------------------------|
| 14/10/2018    | After rainy season | Agaro (stream)               | N-7.865111, E-36.574813 | 0                                       | 0                                                |
| 14/10/2018    | After rainy season | Buluqute (stream)            | N-7.955925, E-36.506322 | 179                                     | 64                                               |
| 18/10/2018    | After rainy season | Gembe(stream)                | N-7.846611,E-36.661874  | 64                                      | 0                                                |
| 18/10/2018    | After rainy season | Jawe (river)                 | N-7.957959, E-36.509508 | 0                                       | 0                                                |
| 18/10/2018    | After rainy season | Naggo Hagayyo (Swamp)        | N-7.954103, E-36.510323 | 78                                      | 2                                                |
| 18/10/2018    | After rainy season | Qarqir(stream)               | N-7.93517, E-36.508335  | 207                                     | 177                                              |
| 21/10/2018    | After rainy season | Semma (river)                | N-7.91972, E-36.513993  | 15                                      | 0                                                |
| 1/11/2018     | After rainy season | Yachi (Irrigation furrow)    | N-7.942895, E-36.512464 | 0                                       | 0                                                |
| 1/11/2018     | After rainy season | Burqa(spring)                | N-7.811247, E-36.683232 | 68                                      | 0                                                |
| 1/11/2018     | After rainy season | Yamo(dam)                    | N-7.940623, E-36.497171 | 169                                     | 24                                               |
| 1/11/2018     | After rainy season | Yisa(stream)                 | N-7.943158, E-36.506631 | 297                                     | 45                                               |
| 12/1/2019     | Dry Season         | Agaro (stream)               | N-7.865111, E-36.574813 | 0                                       | 0                                                |
| 12/1/2019     | Dry Season         | Buluqute (stream)            | N-7.955925, E-36.506322 | 95                                      | 23                                               |
| 12/1/2019     | Dry Season         | Gembe(stream)                | N-7.846611,E-36.661874  | 15                                      | 0                                                |
| 12/1/2019     | Dry Season         | Jawe (river)                 | N-7.957959, E-36.509508 | 0                                       | 0                                                |
| 1/5/2019      | Dry Season         | Naggo Hagayyo (Swamp)        | N-7.954103, E-36.510323 | 34                                      | 0                                                |
| 1/5/2019      | Dry Season         | Qarqir(stream)               | N-7.93517, E-36.508335  | 9                                       | 7                                                |
| 1/5/2019      | Dry Season         | Semma (river)                | N-7.91972, E-36.513993  | 6                                       | 0                                                |
| 1/5/2019      | Dry Season         | Yachi (Irrigation furrow)    | N-7.942895, E-36.512464 | 0                                       | 0                                                |
| 1/5/2019      | Dry Season         | Burqa(spring)                | N-7.811247, E-36.683232 | 26                                      | 0                                                |
| 1/5/2019      | Dry Season         | Yamo(dam)                    | N-7.940623, E-36.497171 | 83                                      | 12                                               |
| 1/5/2019      | Dry Season         | Yisa(stream)                 | N-7.943158, E-36.506631 | 90                                      | 3                                                |
| 19/6/2019     | Rainy season       | Agaro (stream)               | N-7.865111, E-36.574813 | 0                                       | 0                                                |
| 19/6/2019     | Rainy season       | Buluqute (stream)            | N-7.955925, E-36.506322 | 0                                       | 0                                                |
| 19/6/2019     | Rainy season       | Gembe(stream)                | N-7.846611,E-36.661874  | 3                                       | 0                                                |

|           |              |                           |                         |    |   |
|-----------|--------------|---------------------------|-------------------------|----|---|
| 19/6/2019 | Rainy season | Jawe (river)              | N-7.957959, E-36.509508 | 0  | 0 |
| 19/6/2019 | Rainy season | Naggo Hagayyo (Swamp)     | N-7.954103, E-36.510323 | 0  | 0 |
| 19/6/2019 | Rainy season | Qarqir(stream)            | N-7.93517, E-36.508335  | 0  | 0 |
| 19/6/2019 | Rainy season | Semma (river)             | N-7.91972, E-36.513993  | 0  | 0 |
| 19/6/2019 | Rainy season | Yachi (Irrigation furrow) | N-7.942895, E-36.512464 | 0  | 0 |
| 19/6/2019 | Rainy season | Burqa(spring)             | N-7.811247, E-36.683232 | 0  | 0 |
| 1/8/2019  | Rainy season | Yamo(dam)                 | N-7.940623, E-36.497171 | 0  | 0 |
| 1/8/2019  | Rainy season | Yisa (stream)             | N-7.943158, E-36.506631 | 25 | 0 |

---
